# Supplementary material
Source: PubMed Central journal article supplement (PMC7749271)
Supplement: mmc1.pdf [file mmc1.pdf]

**Supplementary Material: Geographic Variation of Racial Disparities in Health and  
COVID-19 Mortality**

---

## eMethods

Participants who responded affirmatively to the question, “Have you ever been told by a doctor, nurse, or other health professionals that you have high blood pressure?” were determined to have hypertension.<sup>1,2</sup> Diabetes was defined as the current use of insulin or self-reported history of diabetes outside of pregnancy. Individuals who reported having their blood cholesterol evaluated and having been told that they had high blood cholesterol levels were defined as having hypercholesterolemia.<sup>1,2</sup> As previously validated, body mass index was computed from self-reported height and weight, and those with a body mass index  $\geq 30$  kg/m<sup>2</sup> were deemed obese.<sup>1-3</sup>

An affirmative response to the question “ever been told that you have chronic obstructive pulmonary disease, emphysema or chronic bronchitis” or “ever been told that you had asthma” was used to identify pulmonary disease. Individuals who reported having myocardial infarction/coronary heart disease were described as having cardiac disease. A history of kidney disease was identified in participants who reported being told that they have kidney disease (not including kidney stones, bladder infection, or incontinence). Those who reported having a stroke in the past were described as being individuals with prior stroke. Patients with a positive response to having been told that they had any type of malignancy, including skin cancer, were deemed to be individuals with malignancy.

Current smokers were defined as individuals who currently smoked and had smoked at least 100 cigarettes in their lifetime.<sup>1,2</sup> Current alcohol abuse was defined as the consumption of >2 drinks a day for men and >1 drink a day for women. Physical inactivity was defined as

individuals who were engaged in  $\leq 75$  minutes per week of vigorous physical activity or  $\leq 150$  minutes per week of moderate-intensity physical activity, as previously described.<sup>1,2</sup>

**eTable 1. Baseline Characteristics of the Study Population**

|                                | Northeast              |                        | Midwest                |                        | South                  |                        | West                   |                        |
|--------------------------------|------------------------|------------------------|------------------------|------------------------|------------------------|------------------------|------------------------|------------------------|
|                                | Blacks                 | Whites                 | Blacks                 | Whites                 | Blacks                 | Whites                 | Blacks                 | Whites                 |
|                                | Prevalence<br>(95% CI) |
| <b>Demographics</b>            |                        |                        |                        |                        |                        |                        |                        |                        |
| 18-44 Years                    | 49.3 (47.2-51.4)       | 39.9 (39.1-40.7)       | 49.8 (47.9-51.7)       | 42.4 (41.8-42.9)       | 51.9 (50.5-53.3)       | 41.8 (41.2-42.5)       | 48.8 (45.1-52.6)       | 44.2 (43.4-45.1)       |
| 45-64 Years                    | 34.5 (32.5-36.5)       | 35.5 (34.8-36.2)       | 34.6 (32.8-36.3)       | 34.5 (34-35)           | 33.1 (31.8-34.3)       | 34.0 (33.4-34.7)       | 34.6 (31-38.3)         | 33.3 (32.6-34.1)       |
| >65 Years                      | 16.2 (14.7-17.6)       | 24.6 (24-25.2)         | 15.6 (14.5-16.8)       | 23.2 (22.8-23.5)       | 15.0 (14.2-15.9)       | 24.1 (23.6-24.6)       | 16.5 (13.2-19.8)       | 22.4 (21.8-23)         |
| Males                          | 53.2 (51.1-55.3)       | 51.6 (50.8-52.4)       | 52.8 (51-54.7)         | 51.0 (50.4-51.5)       | 53.5 (52.1-54.9)       | 51.4 (50.7-52.1)       | 51.7 (47.9-55.5)       | 51.1 (50.3-51.9)       |
| <b>Education</b>               |                        |                        |                        |                        |                        |                        |                        |                        |
| <High School                   | 15.0 (13.3-16.6)       | 9.3 (8.7-9.9)          | 16.3 (14.6-18.1)       | 9.3 (8.9-9.7)          | 15.1 (14.1-16.1)       | 13.0 (12.5-13.6)       | 11.0 (8.5-13.4)        | 13.3 (12.6-14)         |
| High School                    | 32.9 (30.9-35)         | 29.8 (29.1-30.5)       | 32 (30.2-33.7)         | 30.7 (30.2-31.2)       | 33.6 (32.3-34.9)       | 28.6 (28-29.2)         | 26.4 (23.1-29.7)       | 23.8 (23.1-24.4)       |
| Some College                   | 30.4 (28.4-32.3)       | 27.6 (26.9-28.3)       | 33.6 (31.8-35.3)       | 33.2 (32.7-33.7)       | 32.1 (30.8-33.5)       | 31.4 (30.8-32)         | 42.8 (38.9-46.6)       | 35.1 (34.4-35.9)       |
| College Degree                 | 21.7 (20.2-23.2)       | 33.3 (32.6-33.9)       | 18.1 (16.9-19.3)       | 26.8 (26.4-27.2)       | 19.2 (18.2-20.2)       | 26.9 (26.4-27.4)       | 19.9 (17.4-22.4)       | 27.8 (27.2-28.4)       |
| <b>Annual Household Income</b> |                        |                        |                        |                        |                        |                        |                        |                        |
| <\$15,000                      | 15.2 (13.7-16.8)       | 7.0 (6.6-7.4)          | 19.1 (17.5-20.7)       | 7.2 (6.9-7.5)          | 17.7 (16.6-18.9)       | 9.6 (9.1-10)           | 18.9 (15.7-22.1)       | 10.2 (9.6-10.8)        |
| \$15,000-\$25,000              | 21.7 (19.7-23.6)       | 12.6 (12-13.1)         | 25.4 (23.7-27.2)       | 14.2 (13.8-14.6)       | 24.5 (23.3-25.8)       | 17.2 (16.6-17.8)       | 17.4 (14.1-20.8)       | 13.6 (13-14.2)         |
| \$25,000-\$35,000              | 13.0 (11.3-14.6)       | 8.7 (8.2-9.1)          | 12.9 (11.5-14.2)       | 10.1 (9.7-10.4)        | 12.4 (11.4-13.4)       | 10.2 (9.8-10.7)        | 10.1 (7.5-12.6)        | 9.4 (8.9-9.9)          |
| \$35,000-\$50,000              | 14.1 (12.5-15.7)       | 12.3 (11.7-12.8)       | 13.7 (12.1-15.2)       | 14.9 (14.5-15.3)       | 14.2 (13.1-15.3)       | 13.6 (13.1-14.1)       | 13.5 (10.8-16.2)       | 12.8 (12.2-13.4)       |
| >\$50,000                      | 36.0 (33.9-38.2)       | 59.5 (58.7-60.3)       | 28.9 (27.1-30.7)       | 53.5 (53-54.1)         | 31.2 (29.7-32.6)       | 49.4 (48.7-50.2)       | 40.1 (36-44.2)         | 54.0 (53.1-54.8)       |

**eTable 2. Health Determinant Domains Across the United States: Black Individuals**

| State                       | Comorbidities       | Preexisting Medical Conditions | Poor Health Behaviors | Adverse Socioeconomic Factors |
|-----------------------------|---------------------|--------------------------------|-----------------------|-------------------------------|
|                             | Prevalence (95% CI) | Prevalence (95% CI)            | Prevalence (95% CI)   | Prevalence (95% CI)           |
| <b>Alaska</b>               | 77.9 (65.2-90.7)    | 27.8 (13.3-42.2)               | 59.5 (43.1-75.9)      | 35.8 (18.5-53.1)              |
| <b>Alabama</b>              | 70.7 (67.7-73.6)    | 32.5 (29.5-35.5)               | 51.6 (48.3-54.9)      | 52.0 (48.8-55.2)              |
| <b>Arkansas</b>             | 71.1 (64.4-77.8)    | 30.6 (24.5-36.6)               | 57.0 (49.9-64.1)      | 60.3 (53.4-67.2)              |
| <b>Arizona</b>              | 58.3 (53.8-62.8)    | 32.3 (27.7-37.0)               | 49.9 (44.7-55.2)      | 40.9 (35.9-46.0)              |
| <b>California</b>           | 60.7 (55.9-65.5)    | 29.8 (24.9-34.8)               | 61.1 (55.5-66.8)      | 40.3 (34.9-45.8)              |
| <b>Colorado</b>             | 59.1 (53.2-64.9)    | 32.1 (25.6-38.5)               | 58.1 (51.2-65.1)      | 34.4 (28.0-40.8)              |
| <b>Connecticut</b>          | 58.5 (54.3-65.6)    | 30.2 (26.2-34.2)               | 49.7 (45.0-54.3)      | 43.0 (38.6-47.5)              |
| <b>Delaware</b>             | 63.5 (58.2-68.8)    | 27.3 (22.8-31.8)               | 49.7 (43.9-55.4)      | 36.7 (31.6-41.8)              |
| <b>District of Columbia</b> | 60.3 (57.8-62.8)    | 31.8 (29.2-34.3)               | 55.1 (52.4-57.8)      | 41.3 (38.6-44.0)              |
| <b>Florida</b>              | 63.1 (58.9-67.2)    | 22.3 (19.0-25.5)               | 50.7 (46.1-55.3)      | 54.9 (50.6-59.3)              |
| <b>Georgia</b>              | 59.0 (56.1-61.9)    | 26.2 (23.7-28.8)               | 50.9 (47.7-54.1)      | 48.4 (45.3-51.5)              |
| <b>Hawaii</b>               | 55.1 (42.8-67.3)    | 29.4 (18.1-40.7)               | 49.4 (36.6-62.3)      | 28.6 (16.6-40.6)              |
| <b>Iowa</b>                 | 66.9 (59.3-74.5)    | 26.1 (17.7-34.5)               | 59.2 (49.6-68.8)      | 48.9 (39.2-58.6)              |
| <b>Idaho</b>                | 69.3 (52.3-86.4)    | -                              | 30.6 (12.2-49.1)      | 69.0 (53.2-84.8)              |
| <b>Illinois</b>             | 61.2 (56.7-65.7)    | 28.2 (23.9-32.5)               | 57.5 (52.5-62.5)      | 46.2 (41.4-51.1)              |
| <b>Indiana</b>              | 70.8 (67.1-74.4)    | 31.8 (28.1-35.5)               | 53.5 (49.3-57.6)      | 50.6 (46.6-54.6)              |
| <b>Kansas</b>               | 62.2 (58.7-65.7)    | 30.8 (27.2-34.4)               | 53.7 (49.6-57.8)      | 49.4 (45.5-53.4)              |
| <b>Kentucky</b>             | 65.1 (58.8-71.4)    | 38.2 (30.9-45.4)               | 53.7 (46.1-61.3)      | 43.5 (35.9-51.1)              |
| <b>Louisiana</b>            | 66.6 (63.4-69.9)    | 29.0 (25.8-32.1)               | 49.9 (46.0-53.7)      | 57.9 (54.4-61.5)              |
| <b>Maine</b>                | 56.0 (41.6-70.5)    | 24.6 (8.7-40.5)                | 39.6 (25.7-53.6)      | 54.4 (34.2-74.5)              |
| <b>Maryland</b>             | 65.0 (62.4-67.6)    | 29.2 (26.7-31.8)               | 54.2 (51.4-57.0)      | 30.4 (27.8-33.0)              |
| <b>Massachusetts</b>        | 59.9 (53.0-66.8)    | 28.7 (20.6-36.7)               | 48.7 (40.5-56.8)      | 34.3 (26.9-41.8)              |
| <b>Michigan</b>             | 66.1 (62.8-69.4)    | 34.5 (31.2-37.7)               | 52.8 (49.1-56.5)      | 52.1 (48.5-55.7)              |
| <b>Minnesota</b>            | 55.4 (50.5-60.4)    | 24.0 (19.3-28.7)               | 53.3 (47.8-58.8)      | 52.1 (47.2-58.1)              |
| <b>Mississippi</b>          | 68.1 (64.6-71.6)    | 26.5 (23.4-29.7)               | 50.3 (46.4-54.2)      | 60.0 (56.3-63.6)              |

|                       |                  |                  |                  |                  |
|-----------------------|------------------|------------------|------------------|------------------|
| <b>Missouri</b>       | 61.5 (56.6-66.4) | 31.7 (27.2-36.2) | 59.6 (54.5-64.6) | 55.7 (50.6-60.7) |
| <b>Montana</b>        | 47.4 (24.9-69.6) | 28.5 (6.4-50.6)  | 81.1 (66.3-68.5) | 67.8 (43.4-92.3) |
| <b>Nebraska</b>       | 74.1 (68.3-80.0) | 29.4 (23.0-35.8) | 56.3 (49.1-6.4)  | 55.7 (48.7-62.7) |
| <b>Nevada</b>         | 61.2 (53.8-68.6) | 36.5 (28.3-44.7) | 54.9 (46.4-63.4) | 36.8 (28.5-45.0) |
| <b>New Hampshire</b>  | 61.7 (43.2-80.2) | 20.8 (1.0-41.7)  | 73.0 (52.8-93.3) | 37.7 (19.3-56.2) |
| <b>New Jersey</b>     | 62.4 (58.5-66.2) | 26.3 (22.8-29.9) | 50.3 (46.1-53.3) | 39.6 (35.5-43.7) |
| <b>New Mexico</b>     | 58.4 (47.6-69.2) | 27.6 (17.6-37.5) | 63.5 (51.4-75.6) | 41.4 (27.9-54.8) |
| <b>New York</b>       | 60.4 (57.5-63.3) | 27.1 (24.3-30.0) | 50.0 (46.6-53.3) | 43.4 (40.2-46.6) |
| <b>North Carolina</b> | 64.5 (60.7-68.2) | 29.3 (25.4-33.1) | 54.1 (49.8-58.4) | 46.9 (42.8-51.1) |
| <b>North Dakota</b>   | 57.1 (45.1-69.1) | 29.3 (19.9-38.7) | 47.6 (36.1-59.1) | 44.1 (31.5-56.8) |
| <b>Ohio</b>           | 65.2 (61.5-68.9) | 31.3 (27.7-35.0) | 57.2 (53.1-61.3) | 48.7 (44.6-52.9) |
| <b>Oklahoma</b>       | 63.9 (58.7-69.1) | 31.9 (26.3-37.4) | 45.8 (39.7-51.9) | 44.6 (38.7-50.5) |
| <b>Oregon</b>         | 49.8 (38.4-61.3) | 35.2 (24.3-46.1) | 62.2 (50.2-74.1) | 42.9 (31.0-54.8) |
| <b>Pennsylvania</b>   | 61.0 (56.5-65.4) | 28.0 (23.8-32.2) | 58.2 (53.0-63.3) | 45.3 (40.3-50.3) |
| <b>Rhode Island</b>   | 56.7 (49.5-63.9) | 27.0 (20.5-33.5) | 52.1 (44.0-60.1) | 43.6 (35.7-51.5) |
| <b>South Carolina</b> | 69.1 (66.6-71.6) | 28.0 (25.7-30.4) | 51.9 (49.2-54.6) | 52.5 (49.8-55.1) |
| <b>South Dakota</b>   | 26.4 (9.5-43.3)  | -                | 73.9 (57.6-90.2) | 63.5 (39.6-87.3) |
| <b>Tennessee</b>      | 67.1 (62.3-71.9) | 28.9 (24.3-33.5) | 54.7 (49.5-60.0) | 51.8 (46.6-57.0) |
| <b>Texas</b>          | 64.0 (58.5-69.5) | 28.6 (23.2-34.0) | 49.8 (43.7-56.0) | 47.1 (41.2-53.0) |
| <b>Utah</b>           | 58.6 (48.8-68.4) | 22.1 (10.6-33.6) | 48.4 (33.7-63.0) | 59.8 (47.8-71.9) |
| <b>Vermont</b>        | 43.6 (26.9-60.4) | 40.2 (24.3-56.2) | 57.5 (41.4-73.6) | 58.2 (40.1-76.3) |
| <b>Virginia</b>       | 66.4 (63.2-69.6) | 27.8 (24.8-30.7) | 52.3 (48.7-55.8) | 41.5 (38.0-45.0) |
| <b>Washington</b>     | 54.3 (48.2-60.3) | 24.6 (19.1-30.2) | 62.4 (56.0-68.8) | 39.8 (33.3-46.2) |
| <b>West Virginia</b>  | 63.6 (53.4-73.8) | 36.4 (26.2-46.7) | 66.5 (58.0-74.9) | 51.2 (40.6-61.7) |
| <b>Wisconsin</b>      | 57.2 (46.9-67.5) | 25.7 (17.2-34.2) | 54.5 (43.7-65.2) | 48.1 (37.8-58.3) |
| <b>Wyoming</b>        | 65.2 (47.6-82.8) | 26.7 (10.9-42.6) | 53.2 (35.7-70.7) | 38.6 (20.8-56.4) |

**eTable 3. Health Determinant Domains Across the United States: White Individuals**

| State                | Comorbidities       | Preexisting Medical Conditions | Poor Health Behaviors | Adverse Socioeconomic Factors |
|----------------------|---------------------|--------------------------------|-----------------------|-------------------------------|
|                      | Prevalence (95% CI) | Prevalence (95% CI)            | Prevalence (95% CI)   | Prevalence (95% CI)           |
| Alaska               | 56.4 (53.4-59.3)    | 26.1 (23.5-28.6)               | 68.0 (65.1-70.9)      | 27.3 (24.5-30.2)              |
| Alabama              | 61.6 (59.6-63.6)    | 35.9 (34.0-37.8)               | 57.4 (55.3-59.5)      | 35.0 (32.9-37.0)              |
| Arkansas             | 61.8 (59.1-64.6)    | 34.0 (31.4-36.5)               | 58.6 (55.8-61.5)      | 37.6 (34.7-40.5)              |
| Arizona              | 54.9 (53.7-56.1)    | 32.8 (31.7-34.0)               | 58.6 (55.8-61.5)      | 33.2 (31.9-34.5)              |
| California           | 51.4 (49.8-53.0)    | 29.7 (28.3-31.2)               | 63.2 (61.5-64.9)      | 35.8 (34.2-37.5)              |
| Colorado             | 48.7 (47.4-50.0)    | 28.9 (27.7-30.1)               | 67.0 (65.7-68.4)      | 24.3 (23.0-25.5)              |
| Connecticut          | 51.9 (50.3-53.5)    | 31.2 (29.7-32.6)               | 59.6 (57.9-61.3)      | 20.7 (19.2-22.2)              |
| Delaware             | 55.6 (52.8-58.3)    | 32.3 (29.7-35.0)               | 59.7 (56.8-62.5)      | 27.2 (24.6-29.9)              |
| District of Columbia | 43.0 (39.7-46.2)    | 23.9 (21.2-26.7)               | 70.0 (66.8-73.1)      | 8.5 (6.1-10.9)                |
| Florida              | 53.6 (51.8-55.4)    | 31.2 (29.5-33.0)               | 61.0 (59.0-62.9)      | 37.5 (35.6-39.4)              |
| Georgia              | 55.8 (53.7-57.9)    | 29.9 (28.0-31.8)               | 58.2 (56.0-60.4)      | 35.1 (32.9-37.3)              |
| Hawaii               | 47.8 (45.3-50.3)    | 32.5 (30.1-34.9)               | 70.2 (67.8-72.7)      | 25.9 (23.4-28.4)              |
| Iowa                 | 57.3 (55.9-58.7)    | 27.4 (26.2-28.7)               | 60.2 (58.8-61.7)      | 25.0 (23.7-26.4)              |
| Idaho                | 52.5 (50.5-54.4)    | 28.8 (27.1-30.6)               | 62.0 (60.0-64.1)      | 34.1 (32.1-36.2)              |
| Illinois             | 56.9 (54.9-58.8)    | 28.5 (26.8-30.2)               | 62.4 (60.4-64.1)      | 27.7 (25.7-29.6)              |
| Indiana              | 57.7 (56.5-58.9)    | 30.6 (29.5-31.7)               | 60.0 (58.8-61.3)      | 33.6 (32.3-34.8)              |
| Kansas               | 56.8 (55.9-57.7)    | 28.5 (27.7-29.3)               | 58.7 (57.7-59.6)      | 29.5 (28.3-30.4)              |
| Kentucky             | 60.3 (58.5-62.0)    | 33.9 (32.2-35.6)               | 58.8 (56.9-60.6)      | 31.2 (29.4-33.0)              |
| Louisiana            | 60.0 (57.9-62.1)    | 32.6 (30.6-34.7)               | 62.7 (60.6-64.9)      | 34.2 (32.0-36.3)              |
| Maine                | 57.2 (55.5-58.9)    | 31.3 (29.8-32.9)               | 63.4 (61.6-65.1)      | 30.9 (29.2-32.6)              |
| Maryland             | 53.9 *52.2-55.6(    | 30.8 *29.2-32.4(               | 60.4 (58.6-62.2)      | 20.1 (18.4-21.8)              |
| Massachusetts        | 51.3 (49.1-53.4)    | 31.6 (29.5-33.7)               | 60.8 (58.8-61.3)      | 16.9 (15.0-18.7)              |
| Michigan             | 56.1 (54.7-57.4)    | 32.3 (31.0-33.6)               | 62.6 (61.2-64.0)      | 26.9 (25.5-28.2)              |
| Minnesota            | 50.0 (49.0-51.0)    | 25.1 (24.2-26.0)               | 60.2 (59.1-61.2)      | 21.6 (20.6-22.5)              |
| Mississippi          | 60.5 (58.0-63.0)    | 29.8 (27.6-32.0)               | 61.5 (58.9-64.1)      | 40.5 (37.9-43.2)              |

|                       |                   |                  |                  |                  |
|-----------------------|-------------------|------------------|------------------|------------------|
| <b>Missouri</b>       | 55.3 (53.5-57.1)  | 30.6 (29.0-32.2) | 59.9 (58.1-61.7) | 30.3 (28.5-32.0) |
| <b>Montana</b>        | 47.4 (45.5-49.2)  | 28.5 (26.7-30.2) | 64.3 (62.4-66.2) | 31.2 (29.3-33.1) |
| <b>Nebraska</b>       | 55.6 (54.3-56.9)  | 25.5 (24.0-26.9) | 59.2 (57.8-60.5) | 25.5 (23.9-27.1) |
| <b>Nevada</b>         | 54.6 (51.8-57.5)  | 33.2 (30.6-35.8) | 61.5 (58.5-64.4) | 31.9 (29.1-34.8) |
| <b>New Hampshire</b>  | 51.8 (49.6-53.9)  | 33.0 (31.0-35.1) | 63.1 (60.9-65.3) | 23.1 (21.1-25.1) |
| <b>New Jersey</b>     | 54.3 (52.3-56.4)  | 27.0 (25.4-28.6) | 58.8 (56.7-60.8) | 24.0 (22.1-25.8) |
| <b>New Mexico</b>     | 54.5 (52.5-56.6)  | 30.5 (28.6-32.3) | 62.4 (60.3-64.5) | 40.1 (38.0-42.2) |
| <b>New York</b>       | 51.5 (51.0-53.0)  | 25.9 (24.6-27.2) | 59.3 (57.7-60.9) | 28.0 (26.5-29.4) |
| <b>North Carolina</b> | 56.5 (54.3-58.8)  | 31.1 (29.1-33.2) | 62.4 (60.2-64.7) | 31.2 (29.3-33.1) |
| <b>North Dakota</b>   | 55.4 (53.7-57.0)  | 25.5 (24.0-26.9) | 57.7 (55.9-59.4) | 25.5 (23.9-27.1) |
| <b>Ohio</b>           | 57.5 (55.9-59.0)  | 29.3 (28.0-30.7) | 60.8 (59.2-62.3) | 29.4 (27.9-30.9) |
| <b>Oklahoma</b>       | 60.0 (58.2-61.8)  | 32.2 (30.6-33.8) | 54.1 (52.2-56.0) | 36.5 (34.6-38.4) |
| <b>Oregon</b>         | 52.7 (51.0-54.3)  | 32.3 (30.7-33.9) | 65.2 (63.5-66.9) | 30.7 (29.0-32.5) |
| <b>Pennsylvania</b>   | 55.3 (53.5-57.1)  | 31.0 (29.3-32.7) | 63.9 (62.1-65.8) | 26.7 (24.9-28.6) |
| <b>Rhode Island</b>   | 55.4 (53.1-57.6)  | 32.9 (30.9-35.0) | 59.6 (57.3-62.0) | 27.0 (24.8-29.3) |
| <b>South Carolina</b> | 57.7 (56.1--59.4) | 31.4 (29.9-32.9) | 61.4 (59.6-63.1) | 31.5 (29.8-33.2) |
| <b>South Dakota</b>   | 53.0 (50.7-55.3)  | 24.4 (22.4-26.3) | 60.9 (58.5-63.4) | 56.8 (24.5-29.2) |
| <b>Tennessee</b>      | 58.8 (56.8-60.8)  | 34.9 (33.0-36.8) | 59.3 (57.2-61.4) | 35.3 (33.3-37.3) |
| <b>Texas</b>          | 58.9 (56.9-60.9)  | 27.1 (25.3-28.9) | 52.1 (50.0-54.3) | 40.9 (38.8-43.0) |
| <b>Utah</b>           | 49.6 (48.4-50.8)  | 29.6 (28.5-30.7) | 59.5 (58.2-60.8) | 22.9 (21.7-24.0) |
| <b>Vermont</b>        | 50.6 (48.8-52.4)  | 32.0 (30.3-33.7) | 66.1 (64.3-68.0) | 26.7 (24.9-28.5) |
| <b>Virginia</b>       | 55.4 (53.7-57.0)  | 30.5 (28.9-32.0) | 62.7 (61.1-64.4) | 24.8 (23.2-26.4) |
| <b>Washington</b>     | 54.0 (52.7-55.2)  | 33.2 (32.0-34.4) | 65.4 (64.2-66.7) | 24.4 (23.2-25.6) |
| <b>West Virginia</b>  | 65.2 (63.4-67.0)  | 37.4 (35.7-39.1) | 62.5 (60.7-64.3) | 40.9 (39.0-42.8) |
| <b>Wisconsin</b>      | 55.4 (53.5-57.3)  | 25.6 (24.0-27.1) | 65.2 (63.3-67.1) | 24.1 (22.4-25.9) |
| <b>Wyoming</b>        | 52.7 (50.8-54.6)  | 28.4 (26.7-30.1) | 65.1 (63.2-67.0) | 31.5 (29.5-33.4) |



eTable 4. State-Level Health Determinants Across the United States: White Individuals

| State                | Diabetes         | Hypertension     | Hypercholesterolemia | Obesity          | Pulmonary Disease | Malignancy       | Cardiac Disease | Kidney Disease | Stroke        | Alcohol          | Physical Inactivity | Smoking          | Education Status | Household Income | Lack of Health Insurance |
|----------------------|------------------|------------------|----------------------|------------------|-------------------|------------------|-----------------|----------------|---------------|------------------|---------------------|------------------|------------------|------------------|--------------------------|
| Alabama              | 12.4 (11.3-13.6) | 37.1 (35.3-38.8) | 34.5 (32.6-36.4)     | 34.2 (32.2-36.2) | 22.0 (20.3-23.8)  | 14.9 (13.8-16.1) | 8.4 (7.5-9.3)   | 3.9 (3.1-4.7)  | 4.6 (3.9-5.4) | 4.8 (3.8-5.8)    | 44.4 (42.2-46.6)    | 17.0 (14.6-19.5) | 14.8 (13.2-16.5) | 27.1 (25.1-29.1) | 12.9 (11.4-14.5)         |
| Alaska               | 7.6 (6.2-8.9)    | 32.0 (29.4-34.5) | 30.8 (28.0-33.7)     | 32.5 (29.6-35.5) | 15.7 (13.4-17.9)  | 10.6 (9.1-12.1)  | 4.5 (3.5-5.5)   | 2.0 (1.3-2.7)  | 2.3 (1.5-3.2) | 9.2 (7.5-11.0)   | 61.1 (58.0-64.2)    | 22.1 (20.2-23.9) | 6.5 (4.8-8.2)    | 17.2 (14.7-19.7) | 10.9 (8.9-13.0)          |
| Arizona              | 8.5 (7.9-9.1)    | 28.8 (27.8-29.7) | 31.7 (30.5-32.8)     | 29.2 (28.0-30.4) | 20.3 (19.3-21.3)  | 13.7 (13.0-14.3) | 5.5 (5.1-6.0)   | 3.6 (3.3-4.0)  | 2.6 (2.3-2.8) | 6.2 (5.5-6.9)    | 54.1 (52.8-55.5)    | 23.5 (20.8-26.2) | 11.8 (10.7-12.9) | 25.0 (23.8-26.3) | 11.3 (10.4-12.2)         |
| Arkansas             | 11.1 (9.7-12.4)  | 38.9 (36.3-41.5) | 33.4 (30.7-36.0)     | 33.9 (31.1-36.6) | 21.0 (18.7-23.3)  | 13.9 (12.5-15.4) | 8.6 (7.4-9.8)   | 3.4 (2.6-4.1)  | 3.9 (3.0-4.8) | 6.9 (4.9-8.9)    | 45.7 (42.7-48.8)    | 16.9 (15.8-17.9) | 12.5 (10.2-14.8) | 31.2 (28.3-34.1) | 10.2 (8.0-12.4)          |
| California           | 9.0 (8.1-9.9)    | 26.7 (25.4-28.0) | 29.3 (27.8-30.8)     | 26.7 (25.4-28.0) | 17.7 (16.4-19.0)  | 12.3 (11.4-13.3) | 4.9 (4.3-5.6)   | 3.2 (2.6-3.7)  | 2.2 (1.8-2.6) | 7.6 (6.6-8.6)    | 59.4 (57.6-61.2)    | 12.4 (11.1-13.7) | 19.0 (17.5-20.5) | 26.8 (25.2-28.4) | 11.5 (10.4-12.6)         |
| Colorado             | 6.2 (5.6-6.7)    | 25.0 (24.0-26.0) | 28.5 (27.3-29.6)     | 22.4 (21.2-23.6) | 17.3 (16.2-18.3)  | 12.5 (11.7-13.2) | 4.0 (3.6-4.5)   | 2.2 (1.8-2.5)  | 1.9 (1.6-2.3) | 7.4 (6.6-8.2)    | 60.8 (59.4-62.3)    | 14.8 (13.7-15.9) | 6.4 (5.6-7.3)    | 17.1 (15.9-18.2) | 8.8 (7.9-9.6)            |
| Connecticut          | 7.6 (6.9-8.3)    | 6.4 (5.4-7.4)    | 29.2 (27.8-30.6)     | 25.5 (24.1-27.0) | 20.4 (19.0-21.8)  | 11.2 (10.6-11.9) | 4.8 (4.3-5.3)   | 2.5 (2.1-3.0)  | 2.0 (1.7-2.4) | 6.0 (5.2-6.8)    | 54.1 (52.3-55.9)    | 13.2 (11.9-14.4) | 14.2 (13.0-15.5) | 20.4 (19.0-21.8) | 6.4 (5.4-7.4)            |
| Delaware             | 9.3 (8.0-10.6)   | 31.3 (28.9-33.6) | 32.2 (29.5-34.9)     | 29.6 (27.0-32.2) | 19.8 (17.3-22.3)  | 13.4 (12.0-14.8) | 5.8 (4.8-6.8)   | 3.1 (2.2-4.0)  | 2.7 (2.1-3.3) | 7.1 (5.6-8.5)    | 48.9 (45.8-51.9)    | 7.6 (5.6-9.7)    | 10.3 (8.3-12.4)  | 20.5 (18.0-23.0) | 9.8 (7.9-11.8)           |
| District of Columbia | 3.9 (2.8-5.0)    | 19.1 (16.8-21.4) | 29.0 (26.0-32.0)     | 13.1 (10.7-15.5) | 12.6 (10.2-14.9)  | 12.3 (10.6-14.1) | 3.2 (2.2-4.2)   | 1.4 (0.6-2.1)  | 1.0 (0.4-1.3) | 13.5 (11.1-15.9) | 64.9 (61.5-68.3)    | 18.4 (16.1-20.8) | 2.5 (0.7-4.3)    | 5.2 (3.4-7.0)    | 2.6 (1.3-3.9)            |
| Florida              | 8.0 (7.2-8.7)    | 30.5 (29.0-32.0) | 33.0 (31.2-34.9)     | 25.7 (24.0-27.4) | 18.6 (17.0-20.2)  | 13.7 (12.8-14.7) | 6.2 (5.6-6.8)   | 2.2 (1.9-2.5)  | 2.9 (2.4-3.4) | 6.7 (5.9-7.5)    | 51.9 (49.8-53.9)    | 17.4 (16.0-18.9) | 10.3 (9.1-11.6)  | 28.8 (26.8-30.8) | 15.9 (14.4-17.3)         |
| Georgia              | 10.5 (9.3-11.7)  | 31.9 (30.0-33.8) | 31.3 (29.3-33.4)     | 30.9 (28.7-33.1) | 17.5 (15.8-19.2)  | 13.1 (12.0-14.3) | 6.5 (5.6-7.3)   | 3.2 (2.5-3.8)  | 3.0 (2.4-6.4) | 7.3 (6.1-8.5)    | 46.8 (44.5-49.2)    | 20.1 (18.2-22.1) | 13.9 (12.1-15.8) | 25.4 (23.2-27.5) | 15.9 (14.2-17.6)         |
| Hawaii               | 5.4 (4.4-6.4)    | 23.3 (21.4-25.2) | 27.5 (25.2-29.8)     | 20.8 (18.6-23.1) | 19.3 (17.1-21.5)  | 13.6 (12.3-14.9) | 3.9 (3.1-4.8)   | 2.4 (1.7-3.0)  | 2.4 (1.7-3.0) | 12.2 (10.2-14.2) | 63.9 (61.2-66.7)    | 13.4 (11.4-15.4) | 6.9 (5.1-8.7)    | 19.4 (17.2-21.7) | 6.8 (5.3-8.4)            |
| Idaho                | 7.9 (7.0-8.7)    | 28.8 (26.5-30.4) | 28.4 (26.5-30.4)     | 29.0 (27.1-30.9) | 16.7 (15.1-18.2)  | 12.8 (11.6-13.9) | 4.8 (4.1-5.5)   | 2.7 (2.2-3.2)  | 2.5 (2.0-3.0) | 6.0 (5.2-6.8)    | 55.4 (53.2-57.6)    | 17.0 (15.9-18.2) | 9.0 (7.7-10.3)   | 23.8 (22.2-25.7) | 15.4 (13.7-17.1)         |
| Illinois             | 9.8 (8.7-10.8)   | 30.0 (28.5-31.6) | 30.7 (29.0-32.4)     | 31.1 (29.2-33.0) | 17.7 (16.2-19.2)  | 10.2 (9.3-11.0)  | 5.7 (5.0-6.4)   | 3.2 (2.6-3.8)  | 2.4 (1.9-2.9) | 6.5 (5.4-7.6)    | 54.0 (51.9-56.2)    | 14.6 (13.0-16.1) | 10.2 (8.7-11.8)  | 21.0 (19.2-22.8) | 9.6 (8.2-10.9)           |
| Indiana              | 10.8 (10.2-11.4) | 32.8 (31.7-33.8) | 31.4 (30.3-32.5)     | 33.1 (31.9-34.3) | 19.7 (18.7-20.7)  | 11.4 (10.8-12.0) | 7.0 (6.5-7.5)   | 2.9 (2.6-3.3)  | 3.3 (3.0-3.7) | 6.4 (5.7-7.1)    | 46.9 (45.5-48.2)    | 16.1 (14.5-17.8) | 12.1 (11.1-13.2) | 24.9 (23.7-26.1) | 9.7 (8.9-10.5)           |
| Iowa                 | 8.6 (7.9-9.3)    | 29.2 (28.1-30.3) | 29.3 (28.1-30.6)     | 36.9 (35.4-38.3) | 16.7 (15.5-17.8)  | 11.6 (10.9-12.3) | 5.6 (5.1-6.1)   | 1.8 (1.5-2.2)  | 2.6 (2.2-3.0) | 7.6 (6.8-8.4)    | 50.8 (49.3-52.3)    | 23.2 (22.1-24.4) | 7.2 (6.2-8.2)    | 19.5 (18.3-20.7) | 6.7 (5.9-7.5)            |
| Kansas               | 9.6 (9.1-10.0)   | 31.3 (30.6-32.1) | 31.1 (30.2-31.9)     | 33.0 (32.1-33.8) | 17.4 (16.7-18.1)  | 11.7 (11.2-12.2) | 5.6 (5.3-6.0)   | 2.5 (2.2-2.7)  | 2.5 (2.3-2.7) | 6.2 (5.7-6.7)    | 50.0 (49.0-50.9)    | 17.8 (17.1-18.6) | 9.6 (8.8-10.4)   | 20.4 (19.6-21.3) | 12.0 (11.3-12.6)         |
| Kentucky             | 12.0 (10.9-13.0) | 37.1 (35.6-38.7) | 36.0 (34.2-37.9)     | 34.5 (32.7-36.3) | 21.7 (20.1-23.3)  | 13.4 (12.2-14.5) | 9.0 (8.1-10.0)  | 3.8 (3.1-4.5)  | 4.3 (3.6-5.0) | 6.1 (5.2-7.0)    | 44.7 (42.7-46.6)    | 25.7 (24.0-27.5) | 14.7 (13.1-16.3) | 26.5 (24.6-28.4) | 7.0 (6.0-8.0)            |
| Louisiana            | 11.1 (9.8-12.4)  | 35.6 (33.6-37.5) | 35.1 (33.0-37.3)     | 34.0 (31.8-36.1) | 20.0 (18.1-21.8)  | 12.5 (11.3-13.7) | 7.1 (6.2-8.1)   | 3.7 (2.9-4.5)  | 3.5 (2.7-4.2) | 8.0 (6.7-9.3)    | 48.3 (45.9-50.6)    | 24.8 (22.8-26.9) | 12.3 (10.6-14.1) | 26.5 (24.3-28.6) | 9.0 (7.7-10.4)           |
| Maine                | 9.1 (8.3-9.9)    | 31.0 (29.6-32.5) | 32.1 (30.5-33.7)     | 29.1 (27.4-30.7) | 19.9 (18.5-21.3)  | 12.4 (11.6-13.2) | 6.0 (5.4-6.7)   | 2.8 (2.2-3.4)  | 2.4 (2.0-2.9) | 9.6 (8.4-10.7)   | 52.7 (50.8-54.5)    | 14.2 (12.5-15.8) | 7.2 (6.0-8.4)    | 23.5 (22.0-25.1) | 10.4 (9.2-11.6)          |
| Maryland             | 8.0 (7.3-8.7)    | 28.6 (27.4-29.9) | 31.6 (30.1-33.1)     | 28.3 (26.7-30.0) | 17.5 (16.1-18.8)  | 13.3 (12.4-14.1) | 4.8 (4.3-5.3)   | 2.8 (2.1-3.5)  | 2.6 (2.1-3.1) | 7.0 (6.0-8.0)    | 52.7 (50.8-54.6)    | 14.7 (13.4-16.1) | 9.0 (7.5-10.5)   | 14.9 (13.3-16.5) | 6.5 (5.3-7.8)            |
| Massachusetts        | 8.2 (7.1-9.3)    | 26.4 (24.7-28.1) | 28.5 (26.5-30.5)     | 25.6 (23.5-27.7) | 21.1 (19.1-23.0)  | 11.8 (10.6-12.9) | 4.9 (4.0-5.7)   | 2.9 (2.1-3.6)  | 2.5 (1.9-3.1) | 7.9 (6.7-9.1)    | 54.0 (51.6-56.5)    | 18.5 (17.0-20.0) | 7.7 (6.1-9.3)    | 12.4 (10.8-14.1) | 3.7 (2.9-4.6)            |
| Michigan             | 9.3 (8.6-9.9)    | 30.9 (29.5-32.0) | 31.2 (29.9-32.4)     | 30.7 (29.4-32.0) | 20.6 (19.5-21.8)  | 12.2 (11.5-12.9) | 6.7 (6.2-7.3)   | 3.3 (2.8-3.8)  | 3.0 (2.5-3.5) | 7.6 (6.8-8.4)    | 51.1 (49.6-52.6)    | 20.1 (18.9-21.3) | 8.6 (7.5-9.6)    | 20.5 (19.3-21.8) | 7.1 (6.3-8.0)            |
| Minnesota            | 6.9 (6.4-7.3)    | 25.0 (24.2-25.7) | 26.1 (25.2-27.0)     | 28.3 (27.3-29.2) | 13.8 (13.0-14.6)  | 11.0 (10.5-11.5) | 4.5 (4.2-4.8)   | 2.3 (2.0-2.6)  | 2.0 (1.7-2.2) | 7.6 (7.0-8.3)    | 52.5 (51.4-53.6)    | 14.8 (14.0-15.6) | 5.8 (5.1-6.5)    | 16.3 (15.5-17.2) | 6.5 (5.9-7.0)            |
| Mississippi          | 11.9 (10.6-13.3) | 35.2 (33.2-37.3) | 35.6 (33.1-38.0)     | 33.6 (31.1-36.1) | 17.8 (15.8-19.8)  | 13.3 (11.9-14.7) | 8.3 (7.1-9.4)   | 3.1 (2.3-3.9)  | 3.9 (3.1-4.8) | 5.7 (4.3-7.1)    | 47.9 (45.1-50.7)    | 21.3 (19.8-22.9) | 14.5 (12.4-16.7) | 29.5 (26.9-32.1) | 15.2 (13.1-17.3)         |
| Missouri             | 9.3 (8.4-10.2)   | 29.4 (27.9-30.8) | 31.4 (29.6-33.1)     | 32.0 (30.3-33.7) | 18.4 (17.0-19.8)  | 12.6 (11.7-13.6) | 6.9 (6.2-7.6)   | 3.0 (2.5-3.5)  | 3.7 (3.2-4.3) | 6.4 (5.4-7.4)    | 48.0 (46.1-49.9)    | 26.2 (23.7-28.7) | 10.0 (8.7-11.3)  | 22.5 (20.9-24.2) | 11.6 (10.3-12.9)         |
| Montana              | 6.5 (5.7-7.4)    | 26.4 (24.9-28.0) | 24.6 (22.8-26.3)     | 24.4 (22.7-26.1) | 16.9 (15.5-18.4)  | 12.3 (11.2-13.6) | 4.5 (3.9-5.1)   | 2.8 (2.1-3.5)  | 2.1 (1.6-2.5) | 8.7 (7.5-9.9)    | 55.6 (53.5-57.6)    | 16.4 (14.8-18.0) | 6.8 (5.6-8.0)    | 25.3 (23.4-27.2) | 10.5 (9.1-11.9)          |
| Nebraska             | 9.1 (8.4-9.7)    | 28.5 (27.5-29.6) | 29.4 (28.2-30.6)     | 32.4 (31.1-33.7) | 15.7 (14.7-16.7)  | 10.7 (10.1-11.3) | 5.5 (5.1-11.3)  | 2.9 (2.5-3.4)  | 2.6 (2.2-2.9) | 7.7 (6.9-8.5)    | 50.0 (48.6-51.5)    | 17.8 (15.9-19.6) | 6.7 (5.9-7.5)    | 19.9 (18.8-21.0) | 9.8 (8.9-10.7)           |
| Nevada               | 8.0 (6.8-9.2)    | 30.6 (28.2-32.9) | 29.8 (27.1-32.4)     | 25.8 (23.1-28.6) | 19.1 (16.8-21.4)  | 14.4 (12.6-16.1) | 6.4 (5.1-7.7)   | 4.2 (3.0-5.3)  | 3.0 (2.1-3.8) | 7.3 (5.8-8.8)    | 50.6 (47.6-53.7)    | 17.8 (16.4-19.2) | 9.8 (7.7-11.9)   | 22.2 (19.5-24.9) | 12.7 (10.5-14.9)         |
| New Hampshire        | 7.4 (6.6-8.3)    | 27.0 (25.5-28.5) | 29.0 (27.2-30.9)     | 28.3 (26.2-30.3) | 21.7 (19.9-23.6)  | 12.8 (11.7-13.9) | 4.8 (4.2-5.4)   | 2.2 (1.8-2.7)  | 2.4 (1.9-3.0) | 7.9 (6.6-9.2)    | 55.1 (52.7-57.5)    | 15.4 (14.4-16.5) | 7.5 (6.1-8.9)    | 17.5 (15.7-19.3) | 7.4 (6.1-8.8)            |
| New Jersey           | 8.1 (7.3-8.9)    | 29.1 (27.5-30.6) | 32.7 (30.8-34.6)     | 27.3 (25.3-29.3) | 15.7 (14.3-17.2)  | 11.5 (10.7-12.3) | 5.2 (4.5-5.8)   | 2.4 (1.9-2.9)  | 2.2 (1.9-2.5) | 6.6 (5.5-7.6)    | 50.9 (48.7-53.1)    | 16.5 (14.6-18.3) | 7.6 (6.2-8.9)    | 17.6 (16.0-19.2) | 8.3 (7.0-9.7)            |
| New Mexico           | 8.7 (7.7-9.8)    | 28.8 (27.2-30.5) | 29.4 (27.4-31.4)     | 28.3 (26.3-30.3) | 19.3 (17.6-20.9)  | 11.7 (10.6-12.8) | 5.4 (4.4-5.7)   | 3.3 (2.6-3.9)  | 2.5 (1.9-3.0) | 5.8 (4.8-6.7)    | 53.8 (51.5-56.0)    | 15.5 (14.0-17.1) | 13.9 (12.3-15.5) | 35.0 (32.8-37.2) | 11.9 (10.5-13.4)         |
| New York             | 8.0 (7.4-8.7)    | 26.1 (25.0-27.3) | 30.1 (28.7-31.5)     | 24.9 (23.5-26.3) | 16.8 (15.6-17.9)  | 10.0 (9.3-10.7)  | 5.3 (4.7-5.8)   | 2.3 (1.9-2.7)  | 2.1 (1.7-2.5) | 7.4 (6.5-8.2)    | 52.5 (50.8-54.2)    | 18.2 (16.5-20.0) | 10.4 (9.3-11.5)  | 22.4 (21.0-23.8) | 8.2 (7.3-9.2)            |
| North Carolina       | 8.6 (7.5-9.7)    | 31.0 (29.1-32.9) | 32.2 (30.0-34.3)     | 30.2 (28.0-32.4) | 18.4 (16.7-20.2)  | 13.5 (12.2-14.8) | 6.6 (5.6-7.7)   | 3.8 (2.9-4.7)  | 3.0 (2.3-3.8) | 6.6 (5.4-7.9)    | 53.0 (50.6-55.5)    | 18.1 (15.8-20.5) | 10.0 (8.3-11.7)  | 23.1 (20.9-25.2) | 11.5 (9.9-13.2)          |
| North Dakota         | 8.4 (7.6-8.3)    | 29.0 (27.8-30.3) | 28.5 (27.1-29.9)     | 33.1 (31.5-34.8) | 15.3 (14.0-16.6)  | 10.0 (9.2-10.7)  | 5.4 (4.9-6.0)   | 2.4 (2.0-2.9)  | 2.5 (2.0-2.9) | 7.6 (6.6-8.7)    | 46.6 (44.8-48.4)    | 16.0 (14.7-17.2) | 7.2 (6.2-8.3)    | 18.1 (16.6-19.5) | 7.8 (6.7-8.8)            |
| Ohio                 | 9.9 (9.2-10.6)   | 32.1 (30.8-33.4) | 30.8 (29.4-32.2)     | 33.1 (31.6-34.6) | 18.3 (17.0-19.5)  | 11.1 (10.3-11.8) | 6.4 (5.9-7.0)   | 2.6 (2.2-3.0)  | 3.1 (2.7-3.5) | 7.8 (6.9-8.7)    | 48.5 (46.9-50.1)    | 21.4 (20.0-22.8) | 10.2 (9.0-11.4)  | 23.7 (22.3-25.2) | 7.2 (6.3-8.1)            |
| Oklahoma             | 11.3 (10.4-12.3) | 35.5 (34.0-37.1) | 34.2 (32.4-36.0)     | 36.5 (34.6-38.4) | 19.6 (18.1-21.0)  | 12.9 (12.0-13.9) | 7.5 (6.7-8.2)   | 3.9 (3.3-4.5)  | 4.2 (3.5-4.8) | 4.9 (4.0-5.9)    | 42.5 (40.5-44.5)    | 20.6 (18.9-22.2) | 11.9 (10.3-13.6) | 28.5 (26.5-30.4) | 15.6 (14.0-17.2)         |
| Oregon               | 8.5 (7.6-9.4)    | 28.6 (27.2-30.0) | 29.0 (27.3-30.6)     | 29.3 (27.6-31.0) | 20.5 (19.0-21.9)  | 12.8 (11.8-13.7) | 4.8 (4.2-5.4)   | 2.3 (1.8-2.8)  | 2.6 (2.2-3.1) | 8.4 (7.3-9.4)    | 58.8 (56.9-60.7)    | 16.9 (15.5-18.4) | 9.0 (7.7-10.3)   | 24.3 (22.6-26.0) | 9.3 (8.2-10.5)           |
| Pennsylvania         | 8.8 (7.9-9.7)    | 29.3 (27.8-30.8) | 29.7 (28.0-31.3)     | 31.4 (29.6-33.2) | 20.0 (18.4-21.6)  | 11.9 (10.9-12.8) | 6.7 (5.8-7.6)   | 2.4 (1.8-2.9)  | 3.0 (2.4-3.5) | 6.7 (5.8-7.6)    | 54.0 (52.1-56.0)    | 19.9 (18.3-21.4) | 10.1 (9.4-11.7)  | 19.5 (18.0-21.0) | 6.4 (5.4-7.5)            |
| Rhode Island         | 7.8 (6.8-8.8)    | 31.0 (29.1-32.8) | 31.0 (29.0-33.1)     | 30.3 (28.1-32.5) | 21.6 (19.7-23.5)  | 12.8 (11.8-13.8) | 5.4 (4.7-6.1)   | 2.6 (2.0-3.1)  | 2.9 (2.3-3.4) | 7.7 (6.3-9.1)    | 52.3 (49.9-54.8)    | 15.3 (13.5-17.2) | 10.2 (8.5-12.0)  | 21.2 (19.0-23.3) | 6.0 (4.7-7.4)            |
| South Carolina       | 10.6 (9.8-11.5)  | 32.5 (31.1-33.9) | 33.0 (31.4-34.5)     | 31.7 (30.0-33.3) | 18.9 (17.5-20.2)  | 13.5 (12.7-14.4) | 6.8 (6.2-7.5)   | 2.8 (2.3-3.2)  | 3.0 (2.6-3.5) | 7.9 (6.9-8.9)    | 50.7 (48.8-52.5)    | 20.2 (18.7-21.7) | 10.6 (9.4-11.8)  | 22.8 (21.2-24.4) | 12.4 (11.1-13.7)         |
| South Dakota         | 9.0 (7.8-10.3)   | 28.3 (26.4-30.1) | 25.7 (23.6-27.8)     | 30.4 (28.1-32.7) | 13.4 (11.7-15.1)  | 10.7 (9.5-11.9)  | 6.8 (5.6-7.9)   | 2.5 (1.6-3.4)  | 2.2 (1.6-2.9) | 6.6 (5.2-8.0)    | 51.4 (48.8-54.0)    | 18.7 (16.7-20.8) | 7.5 (5.8-9.2)    | 18.2 (16.0-20.3) | 9.9 (8.3-11.6)           |
| Tennessee            | 11.8 (10.7-12.9) | 36.0 (34.2-37.0) | 34.7 (32.6-36.7)     | 31.1 (29.2-33.1) | 22.3 (20.5-24.0)  | 13.4 (12.3-14.6) | 7.9 (7.0-8.9)   | 3.3 (2.6-3.9)  | 3.9 (3.1-4.6) | 5.5 (4.5-6.5)    | 47.6 (45.4-49.8)    | 23.1 (21.3-24.9) | 12.8 (11.2-14.4) | 28.4 (26.4-30.3) | 13.6 (12.0-15.1)         |
| Texas                | 11.6 (10.4-12.9) | 31.9 (30.1-33.8) | 32.0 (30.0-33.9)     | 33.3 (31.2-35.4) | 15.4 (13.9-17.0)  | 11.1 99.9-12.3)  | 5.8 (4.9-6.7)   | 3.1 (2         |               |                  |                     |                  |                  |                  |                          |

eTable 5. State-Level Health Determinants Across the United States: Black Individuals

| State                | Diabetes         | Hypertension     | Hypercholesterolemia | Obesity          | Pulmonary Disease | Malignancy      | Cardiac Disease | Kidney Disease  | Stroke         | Alcohol        | Physical Inactivity | Smoking           | Education Status | Household Income | Lack of Health Insurance |
|----------------------|------------------|------------------|----------------------|------------------|-------------------|-----------------|-----------------|-----------------|----------------|----------------|---------------------|-------------------|------------------|------------------|--------------------------|
| Alabama              | 16.9 (14.4-19.4) | 49.3 (46.5-52.1) | 30.5 (27.6-33.4)     | 44.6 (41.4-47.8) | 23.5 (20.7-26.2)  | 6.6 (5.3-7.9)   | 6.3 (5.1-7.6)   | 4.0 (2.9-5.0)   | 4.5 (3.5-5.5)  | 4.6 (2.7-6.6)  | 38.7 (35.3-42.2)    | 24.1 (7.4-40.8)   | 16.9 (14.4-19.4) | 51.8 (48.2-55.5) | 18.4 (15.7-21.0)         |
| Alaska               | 14.9 (3.6-26.3)  | 55.7 (40.7-70.6) | 35.0 (21.2-48.8)     | 49.0 (32.4-65.6) | 20.7 (7.5-33.8)   | 9.3 (1.3-17.2)  | 11.3 (0.7-23.3) | .               | .              | 3.8 (0.9-8.5)  | 56.4 (38.9-73.9)    | 21.7 (18.9-24.6)  | .                | 28.6 (11.6-45.6) | 12.3 (0.6-25.1)          |
| Arizona              | 12.8 (9.9-15.6)  | 35.5 (31.4-39.6) | 24.0 (20.3-27.8)     | 34.7 (29.9-39.6) | 23.8 (19.5-28.0)  | 5.6 (3.6-7.6)   | 5.6 (3.6-7.7)   | 4.9 (3.1-6.7)   | 4.0 (2.0-5.9)  | 2.9 (1.1-4.8)  | 43.5 (38.0-49.1)    | 22.6 (16.2-28.9)  | 12.5 (8.1-17.0)  | 33.5 (28.3-38.7) | 11.9 (8.5-15.3)          |
| Arkansas             | 14.8 (11.0-18.6) | 51.1 (44.4-57.7) | 28.9 (23.8-34.0)     | 45.9 (38.6-53.3) | 21.0 (15.3-26.8)  | 5.1 (3.0-7.1)   | 6.5 (3.9-9.1)   | 5.2 (2.9-7.5)   | 6.5 (3.5-9.5)  | 3.4 (1.1-5.7)  | 47.0 (39.4-54.7)    | 17.5 (13.7-21.2)  | 21.2 (15.2-27.3) | 55.5 (47.5-62.5) | 11.7 (6.9-16.5)          |
| California           | 13.3 (9.2-17.3)  | 40.8 (36.0-45.5) | 25.2 (20.1-30.3)     | 32.8 (27.3-38.3) | 22.1 (17.8-26.5)  | 4.9 (2.3-7.6)   | 3.1 (1.3-4.8)   | 4.0 (1.5-6.5)   | 3.0 (1.0-5.0)  | 5.1 (2.7-7.5)  | 55.3 (49.2-61.4)    | 18.1 (13.5-22.7)  | 10.6 (7.1-14.2)  | 36.9 (31.1-42.6) | 10.4 (7.2-13.6)          |
| Colorado             | 11.4 (7.0-15.8)  | 37.6 (31.7-43.5) | 28.1 (21.9-34.3)     | 30.9 (24.4-37.3) | 23.2 (17.5-28.8)  | 7.8 (3.8-11.8)  | 3.0 (1.2-4.9)   | 1.8 (0.2-3.5)   | 2.8 (1.1-4.6)  | 3.5 (1.2-5.9)  | 49.6 (42.1-57.1)    | 20.8 (15.05-26.6) | 11.9 (6.7-17.1)  | 30.2 (23.6-36.8) | 5.8 (2.7-8.9)            |
| Connecticut          | 16.9 (14.1-19.6) | 36.8 (33.2-40.4) | 28.0 (23.9-32.0)     | 36.8 (32.4-41.3) | 21.3 (17.7-24.9)  | 6.9 (4.9-9.0)   | 4.8 (3.1-6.5)   | 4.7 (2.8-6.5)   | 2.9 (1.7-4.1)  | 3.2 (1.8-4.6)  | 45.5 (40.5-50.5)    | 14.2 (11.0-17.5)  | 15.7 (12.1-19.3) | 34.5 (29.7-39.4) | 12.0 (9.1-15.0)          |
| Delaware             | 11.9 (9.2-14.7)  | 39.3 (34.5-44.1) | 31.9 (26.0-37.7)     | 39.5 (33.9-45.1) | 21.8 (17.6-26.1)  | 4.6 (2.9-6.3)   | 5.2 (3.4-7.1)   | 2.7 (1.5-3.9)   | 4.6 (3.0-6.2)  | 4.7 (2.4-6.9)  | 41.7 (35.8-47.6)    | 21.9 (19.7-24.1)  | 10.5 (7.4-13.6)  | 33.5 (28.2-38.8) | 8.0 (5.1-10.8)           |
| District of Columbia | 12.4 (10.9-13.9) | 39.5 (37.3-41.6) | 29.6 (27.2-31.9)     | 35.8 (33.2-38.4) | 23.5 (21.1-25.9)  | 5.0 (4.0-6.0)   | 5.3 (4.2-6.4)   | 3.6 (2.6-4.6)   | 5.5 (4.3-6.8)  | 6.6 (5.2-8.0)  | 43.1 (40.4-45.8)    | 17.1 (13.1-21.1)  | 17.8 (15.0-20.5) | 34.3 (31.6-37.0) | 6.7 (5.1-8.3)            |
| Florida              | 12.9 (10.3-15.5) | 37.9 (34.2-41.5) | 30.0 (25.7-34.4)     | 37.7 (33.1-42.3) | 13.4 (10.9-15.9)  | 5.8 (3.8-7.0)   | 5.4 (3.8-7.0)   | 3.1 (1.8-4.3)   | 4.4 (2.7-6.1)  | 5.0 (2.3-7.7)  | 42.0 (37.2-46.8)    | 15.9 (12.2-19.5)  | 19.1 (15.6-22.6) | 47.7 (42.7-52.8) | 18.9 (15.7-22.0)         |
| Georgia              | 12.8 (11.1-14.5) | 37.4 (34.9-40.0) | 26.6 (24.1-29.1)     | 35.9 (32.9-39.0) | 17.1 (14.9-19.4)  | 5.7 (4.5-6.9)   | 5.0 (3.9-6.2)   | 2.9 (2.0-3.7)   | 4.6 (3.6-5.7)  | 3.3 (2.1-4.5)  | 45.2 (41.9-48.6)    | 16.4 (13.9-18.8)  | 13.0 (10.7-15.2) | 40.9 (37.7-44.2) | 17.8 (15.4-20.2)         |
| Hawaii               | 19.6 (9.7-29.5)  | 37.0 (38.0-48.0) | 28.5 (16.6-40.5)     | 32.4 (19.8-45.1) | 20.8 (10.2-31.4)  | .               | 6.2 (1.1-11.3)  | .               | .              | .              | 44.1 (30.2-58.0)    | 11.1 (2.8-19.5)   | 10.6 (1.0-21.1)  | 27.4 (15.2-39.6) | 6.2 (0.2-12.3)           |
| Idaho                | .                | 52.9 (38.1-67.7) | .                    | 22.5 (4.5-40.5)  | .                 | .               | .               | .               | .              | .              | .                   | 34.2 (24.7-43.7)  | 39.3 (23.9-54.8) | 63.5 (45.7-81.4) | 19.1 (4.1-34.2)          |
| Illinois             | 14.3 (11.4-17.2) | 38.6 (34.3-42.9) | 28.5 (24.3-32.8)     | 38.6 (33.9-43.4) | 19.8 (16.3-23.4)  | 4.9 (3.3-6.5)   | 6.2 (4.4-8.1)   | 4.7 (1.9-7.5)   | 3.9 (2.4-5.3)  | 6.3 (3.9-8.8)  | 47.6 (42.5-52.7)    | 19.4 (3.8-35.0)   | 15.1 (10.6-19.6) | 39.1 (34.2-44.0) | 11.9 (8.8-15.0)          |
| Indiana              | 16.6 (14.1-19.1) | 48.7 (44.8-52.6) | 30.3 (26.9-33.8)     | 43.2 (39.0-47.3) | 22.3 (18.9-25.6)  | 6.0 (4.5-7.5)   | 6.1 (4.5-7.8)   | 4.3 (2.8-5.8)   | 4.8 (3.3-6.3)  | 5.2 (3.2-7.3)  | 40.5 (36.2-44.9)    | 19.9 (15.7-24.0)  | 14.5 (11.3-17.8) | 45.4 (41.1-49.7) | 13.6 (10.6-16.7)         |
| Iowa                 | 17.0 (9.8-24.1)  | 41.9 (34.6-49.1) | 31.1 (22.5-39.6)     | 43.2 (33.7-52.7) | 21.9 (14.2-29.7)  | 1.8 (0.2-3.8)   | 6.3 (1.4-11.2)  | .               | .              | 5.7 (1.3-10.0) | 43.0 (32.7-53.3)    | 21.9 (18.4-25.4)  | 13.5 (6.1-20.8)  | 47.5 (36.9-58.1) | 11.6 (5.8-17.5)          |
| Kansas               | 15.9 (13.4-18.4) | 43.7 (40.0-47.0) | 28.7 (25.3-32.1)     | 37.9 (34.0-41.9) | 21.7 (18.4-25.0)  | 6.8 (4.9-8.7)   | 8.2 (6.2-10.2)  | 4.6 (3.1-6.2)   | 6.6 (4.6-8.6)  | 6.8 (4.6-9.0)  | 42.2 (37.8-46.6)    | 23.7 (20.2-27.3)  | 16.4 (12.8-20.0) | 42.6 (38.3-46.9) | 19.3 (16.1-22.5)         |
| Kentucky             | 12.7 (8.1-17.2)  | 50.2 (44.5-55.9) | 31.0 (24.6-37.3)     | 35.7 (28.3-43.0) | 27.8 (21.0-34.6)  | 8.7 (5.1-12.3)  | 7.7 (4.5-10.8)  | 4.9 (1.9-8.0)   | 6.6 (3.4-9.9)  | 3.7 (1.3-6.1)  | 43.9 (36.1-51.7)    | 24.3 (18.1-30.6)  | 16.1 (10.1-22.0) | 42.2 (33.3-51.1) | 12.6 (7.2-18.0)          |
| Louisiana            | 17.8 (15.3-20.2) | 45.4 (42.4-48.3) | 34.8 (31.3-38.3)     | 42.7 (39.0-46.4) | 20.0 (17.2-22.8)  | 5.6 (4.1-7.1)   | 7.6 (6.0-9.2)   | 3.6 (2.4-4.8)   | 6.6 (5.0-8.2)  | 5.4 (3.7-7.1)  | 38.2 (34.3-42.2)    | 21.0 (17.9-24.1)  | 24.6 (21.0-28.1) | 54.0 (50.0-58.0) | 13.4 (10.8-15.9)         |
| Maine                | 14.0 (2.0-26.0)  | 29.5 (11.4-47.6) | 45.9 (30.8-61.1)     | 29.5 (15.8-43.2) | 24.1 (9.3-39.0)   | .               | .               | 19.6 (1.2-37.9) | .              | .              | 29.5 (15.8-43.2)    | 15.5 (9.3-21.7)   | 23.0 (4.7-41.2)  | 19.4 (6.8-32.1)  | 18.6 (4.4-32.8)          |
| Maryland             | 13.9 (12.4-15.5) | 38.0 (35.8-40.2) | 28.1 (25.8-30.4)     | 42.3 (39.5-45.0) | 22.3 (19.8-24.7)  | 5.5 (4.5-6.5)   | 5.3 (4.2-6.5)   | 3.1 (2.4-3.9)   | 3.5 (2.7-4.3)  | 3.7 (2.5-5.0)  | 48.5 (45.5-51.5)    | 15.2 (13.0-17.4)  | 9.7 (7.8-11.7)   | 26.0 (23.4-28.6) | 7.9 (6.3-9.5)            |
| Massachusetts        | 10.4 (6.2-14.7)  | 35.2 (28.4-42.1) | 28.7 (21.9-35.6)     | 34.0 (26.4-41.6) | 19.8 (12.3-27.2)  | 7.4 (3.1-11.7)  | 6.6 (2.5-10.7)  | 3.3 (1.0-5.8)   | 6.1 (2.2-10.1) | 4.6 (1.3-7.9)  | 43.1 (34.7-51.4)    | 15.4 (1.6-29.3)   | 18.3 (11.8-24.9) | 23.0 (16.1-30.0) | 11.9 (6.7-17.0)          |
| Michigan             | 14.3 (12.2-16.5) | 44.3 (41.1-47.5) | 33.2 (29.7-36.6)     | 40.8 (37.1-44.5) | 26.8 (23.7-30.0)  | 6.7 (5.2-8.2)   | 9.0 (7.1-10.9)  | 4.5 (3.1-5.9)   | 5.3 (3.9-6.7)  | 4.0 (2.5-5.4)  | 40.3 (36.5-44.1)    | 21.7 (18.7-24.7)  | 18.3 (14.8-21.9) | 49.7 (45.8-53.6) | 11.9 (9.5-14.4)          |
| Minnesota            | 12.4 (8.5-16.4)  | 33.1 (28.2-38.0) | 27.4 (22.2-32.6)     | 32.0 (26.8-37.2) | 15.7 (11.5-19.9)  | 8.0 (4.7-11.4)  | 7.2 (3.8-10.7)  | 5.0 (1.7-8.4)   | 7.1 (3.3-10.8) | 3.8 (1.8-5.8)  | 43.7 (37.8-49.6)    | 21.9 (17.1-26.8)  | 19.5 (14.2-24.8) | 43.6 (37.9-49.4) | 15.7 (11.9-19.6)         |
| Mississippi          | 16.9 (14.8-19.1) | 47.9 (44.6-51.3) | 35.0 (31.5-38.4)     | 45.3 (41.4-49.1) | 17.1 (14.2-19.9)  | 5.5 (4.2-6.7)   | 6.9 (5.3-8.4)   | 2.8 (1.5-4.1)   | 5.6 (4.3-6.8)  | 3.8 (2.3-5.4)  | 39.0 (34.8-43.1)    | 26.2 (21.6-30.9)  | 21.5 (18.1-24.9) | 56.5 (52.5-60.5) | 22.0 (18.6-25.5)         |
| Missouri             | 13.6 (10.7-16.5) | 38.7 (34.5-42.9) | 26.7 (22.5-30.8)     | 40.3 (35.1-45.5) | 22.7 (18.5-26.8)  | 7.1 (4.9-9.4)   | 6.2 (3.8-8.7)   | 3.5 (2.1-4.9)   | 5.8 (3.6-8.1)  | 3.4 (1.6-5.3)  | 45.4 (39.9-50.9)    | 19.8 (16.6-23.0)  | 20.4 (15.9-25.0) | 50.5 (44.9-56.1) | 23.6 (19.0-28.3)         |
| Montana              | .                | 22.9 (2.3-44.4)  | 22.3 (2.0-44.4)      | .                | .                 | 20.5 (1.3-40.8) | .               | .               | .              | .              | 62.8 (37.0-88.7)    | .                 | .                | 56.2 (29.7-82.7) | 36.2 (9.7-62.8)          |
| Nebraska             | 16.7 (12.1-21.3) | 50.2 (44.3-56.2) | 31.0 (24.9-37.1)     | 46.1 (38.8-53.4) | 22.8 (16.8-28.8)  | 8.2 (4.3-12.1)  | 10.2 (6.1-14.2) | 1.5 (0.3-2.7)   | 4.8 (2.1-7.5)  | 3.9 (1.1-6.8)  | 45.1 (37.6-52.7)    | 20.5 (16.9-24.0)  | 14.8 (8.9-20.6)  | 52.1 (44.7-59.4) | 17.1 (11.9-22.2)         |
| Nevada               | 15.6 (10.4-20.8) | 41.6 (35.2-48.0) | 31.6 (24.7-38.4)     | 32.6 (24.6-40.7) | 29.9 (22.0-37.7)  | 2.5 (0.1-5.1)   | 6.1 (2.5-9.6)   | 7.5 (2.7-12.3)  | 4.0 (1.0-7.0)  | 3.9 (0.7-7.1)  | 42.8 (33.9-51.7)    | 10.8 (3.7-18.0)   | 7.9 (2.6-13.3)   | 39.1 (30.1-48.1) | 6.1 (2.0-10.3)           |
| New Hampshire        | .                | 33.3 (8.9-57.7)  | 34.1 (17.7-50.6)     | 39.6 (13.3-66.0) | .                 | .               | .               | .               | .              | .              | .                   | 20.9 (15.2-26.6)  | .                | 22.7 (1.0-45.5)  | 22.2 (2.1-42.2)          |
| New Jersey           | 14.1 (11.7-16.5) | 40.2 (36.5-43.9) | 30.2 (26.7-33.6)     | 34.7 (30.6-38.7) | 20.2 (16.8-23.6)  | 4.4 (3.2-5.6)   | 5.0 (3.4-6.7)   | 3.8 (2.1-5.5)   | 2.8 (1.8-3.9)  | 3.6 (2.1-5.0)  | 43.3 (38.8-47.8)    | .                 | 13.6 (10.3-16.9) | 32.5 (28.5-36.6) | 12.0 (9.2-14.7)          |
| New Mexico           | 10.4 (4.2-16.7)  | 36.6 (25.6-47.5) | 24.4 (14.2-34.6)     | 25.5 (13.8-37.1) | 18.4 (8.6-28.2)   | 6.4 (1.0-11.9)  | 10.7 (1.7-19.7) | 3.6 (0.5-7.6)   | 3.2 (0.1-6.5)  | 6.6 (0.2-13.5) | 53.8 (38.6-68.9)    | 14.4 (11.7-17.1)  | 6.2 (0.5-11.8)   | 36.5 (22.7-50.2) | 14.3 (4.9-23.7)          |
| New York             | 13.9 (11.9-16.0) | 38.1 (35.3-40.9) | 31.0 (28.1-33.9)     | 34.3 (31.3-37.4) | 19.7 (17.1-22.2)  | 5.3 (3.8-6.9)   | 6.1 (4.7-7.5)   | 3.4 (2.3-4.6)   | 2.9 (2.0-3.9)  | 4.4 (3.0-5.7)  | 43.2 (39.7-46.8)    | 21.1 (9.7-32.6)   | 16.0 (13.4-18.6) | 38.4 (34.9-41.8) | 10.9 (8.9-12.8)          |
| North Carolina       | 17.5 (14.5-20.5) | 42.2 (38.7-45.6) | 33.6 (29.6-37.7)     | 41.6 (37.3-45.8) | 19.4 (16.1-22.8)  | 5.5 (3.8-7.1)   | 4.2 (2.9-5.6)   | 4.8 (2.8-6.8)   | 4.9 (3.2-6.6)  | 5.9 (3.8-8.0)  | 44.2 (39.7-48.8)    | 22.8 (15.6-30.1)  | 15.6 (12.5-18.7) | 39.4 (35.0-43.9) | 16.9 (13.7-20.1)         |
| North Dakota         | .                | 15.5 (5.4-25.6)  | 26.5 (15.0-38.0)     | 39.7 (28.2-51.2) | 25.9 (17.6-34.3)  | .               | .               | .               | .              | .              | 42.5 (31.3-53.6)    | 14.6 (12.3-16.9)  | 9.6 (1.4-20.7)   | 32.1 (19.9-44.4) | 13.6 (6.7-20.4)          |
| Ohio                 | 14.0 (11.7-16.4) | 39.1 (35.6-42.5) | 25.6 (22.2-29.0)     | 42.5 (38.3-46.7) | 22.7 (19.2-26.2)  | 5.6 (4.0-7.2)   | 8.7 (6.6-10.8)  | 3.0 (1.8-4.1)   | 5.2 (3.6-6.9)  | 5.2 (3.2-7.2)  | 44.1 (39.7-48.5)    | 25.4 (21.6-29.1)  | 14.7 (11.2-18.2) | 43.0 (38.6-47.4) | 10.9 (8.1-13.7)          |
| Oklahoma             | 14.4 (10.7-18.2) | 45.3 (40.1-50.4) | 27.2 (22.0-32.4)     | 36.7 (30.9-42.6) | 23.5 (18.3-28.8)  | 6.8 (3.7-9.8)   | 6.9 (3.9-9.9)   | 2.6 (1.1-4.2)   | 4.0 (1.9-6.2)  | 2.5 (0.6-4.4)  | 37.8 (31.5-44.2)    | 18.9 (14.0-23.8)  | 11.1 (6.6-15.5)  | 41.9 (35.3-48.5) | 15.1 (10.7-19.6)         |
| Oregon               | 13.4 (5.9-21.0)  | 29.0 (18.7-39.3) | 30.6 (18.6-42.6)     | 29.7 (17.5-41.8) | 19.6 (10.1-29.2)  | 11.8 (3.9-19.7) | 5.4 (1.0-10.9)  | 6.2 (1.7-11.7)  | 2.1 (1.2-5.3)  | 7.3 (1.0-13.6) | 53.5 (40.6-66.4)    | 26.9 (16.6-37.2)  | 7.4 (1.0-13.8)   | 41.3 (28.7-54.0) | 10.4 (3.3-17.5)          |
| Pennsylvania         | 13.9 (10.9-16.9) | 39.4 (35.1-43.7) | 27.7 (23.5-32.0)     | 37.4 (32.5-42.3) | 19.0 (15.3-22.6)  | 6.5 (4.3-8.6)   | 6.7 (4.6-8.9)   | 2.6 (1.4-3.9)   | 4.5 (2.6-6.4)  | 6.2 (3.6-8.8)  | 51.4 (46.0-56.8)    | 19.6 (15.8-23.4)  | 12.5 (9.0-16.0)  | 42.3 (37.0-47.7) | 9.8 (7.0-12.6)           |
| Rhode Island         | 11.6 (7.5-15.6)  | 38.3 (31.7-44.9) | 27.2 (20.2-34.2)     | 35.0 (27.5-42.4) | 23.8 (17.5-30.2)  | 5.4 (2.3-8.4)   | 5.1 (2.2-8.0)   | 2.1 (0.6-3.6)   | 3.6 (1.3-5.9)  | 5.2 (1.2-9.2)  | 44.1 (35.7-52.6)    | 18.7 (12.3-25.0)  | 18.7 (11.2-26.1) | 40.3 (31.9-48.8) | 9.0 (4.9-13.1)           |
| South Carolina       | 18.4 (16.7-20.1) | 46.0 (43.7-48.4) | 33.4 (31.2-35.7)     | 43.4 (40.6-46.1) | 18.8 (16.6-20.9)  | 6.1 (5.1-7.1)   | 6.2 (5.2-7.2)   | 3.3 (2.4-4.1)   | 5.0 (4.0-6.0)  | 4.3 (3.2-5.4)  | 44.3 (41.4-47.2)    | 18.5 (16.3-20.6)  | 18.2 (16.1-20.4) | 48.8 (45.9-51.7) | 15.8 (13.7-17.9)         |
| South Dakota         | .                | 12.5 (1.2-23.9)  | .                    | 19.4 (4.1-34.8)  | .                 | .               | .               | .               | .              | .              | 26.4 (11.3-41.5)    | 50.3 (33.4-67.1)  | 37.6 (14.2-61.0) | 74.7 (56.2-93.2) | 23.8 (4.9-42.6)          |
| Tennessee            | 17.5 (14.1-20.8) | 44.3 (39.8-48.7) | 28.9 (24.7-33.1)     | 44.2 (38.7-49.6) | 17.3 (13.3-21.2)  | 5.8 (3.8-7.8)   | 6.7 (4.3-9.1)   | 4.4 (2.4-6.3)   | 5.9 (3.7-8.1)  | 6.5 (3.5-9.5)  | 43.3 (37.7-48.9)    | 23.7 (18.7-28.6)  | 15.1 (10.6-19.6) | 45.4 (39.6-51.1) | 19.0 (14.4-23.6)         |
| Texas                | 15.8 (11.3-20.3) | 46.0 (40.8-51.3) | 35.7 (29.8-41.5)     | 39.5 (33.6-45.4) | 20.6 (15.6-25.6)  | 3.0 (1.6-4.4)   | 6.7 (3.8-9.7)   | 4.2 (2.0-6.4)   | 5.7 (3.1-8.4)  | 5.5 (2.5-8.5)  | 37.4 (31.3-43.6)    | 19.5 (14.7-24.2)  | 11.2 (7.2-15.1)  | 38.4 (32.3-44.4) | 26.2 (20.9-31.4)         |
| Utah                 | 8.8 (1.5-16.2)   | 44.9 (33.1-56.8) | 42.3 (26.5-58.2)     | 24.9 (14.2-35.7) | 18.7 (7.6-29.7)   | .               | 4.1 (0.1-8.3)   | 7.1 (0.3-14.5)  | .              | .              | 42.9 (28.8-57.0)    | 12.4 (4.4-20.4)   | 25.6 (13.9-37.4) | 44.3 (29.6-59.0) | 26.7 (17.0-36.4)         |
| Vermont              | 20.2 (9.6-30.8)  | 24.3 (9.4-39.3)  | 7.2 (1.3-14.0)       | 42.3 (22.4-62.2) | 30.3 (10.5-50.2)  | 5.3 (0.9-11.4)  | .               | 11.9 (1.2-23.7) | 5.3 (2.1-8.5)  | .              | .                   | 24.9 (9.0-40.9)   | 13.5 (1.0-26.8)  | 50.4 (31.8-68.9) | 16.9 (3.6-30.2)          |
| Virginia             | 16.6 (14.5-18.7) | 42.9 (40.0-45.8) | 32                   |                  |                   |                 |                 |                 |                |                |                     |                   |                  |                  |                          |

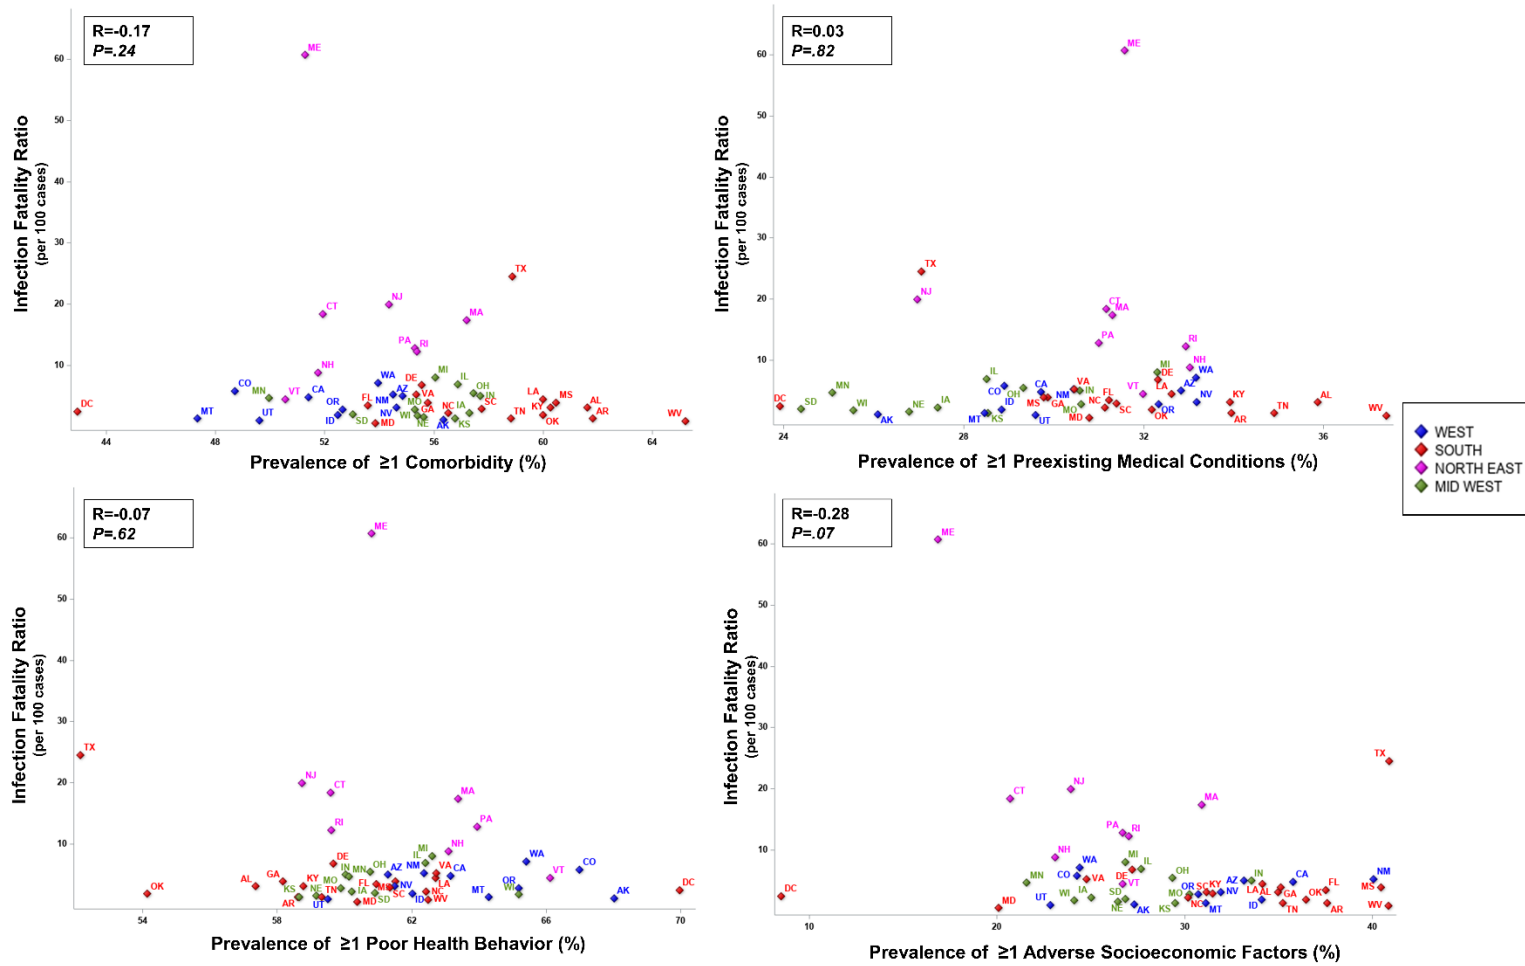

Figure. Relationship of Geographic Distribution of COVID-19 IFR and Prevalence of Health Determinants in White Individuals

eFigure 1. Relationship of Geographic Distribution of COVID-19 Infection-Fatality Ratio and Prevalence of Health Determinants in White Individuals

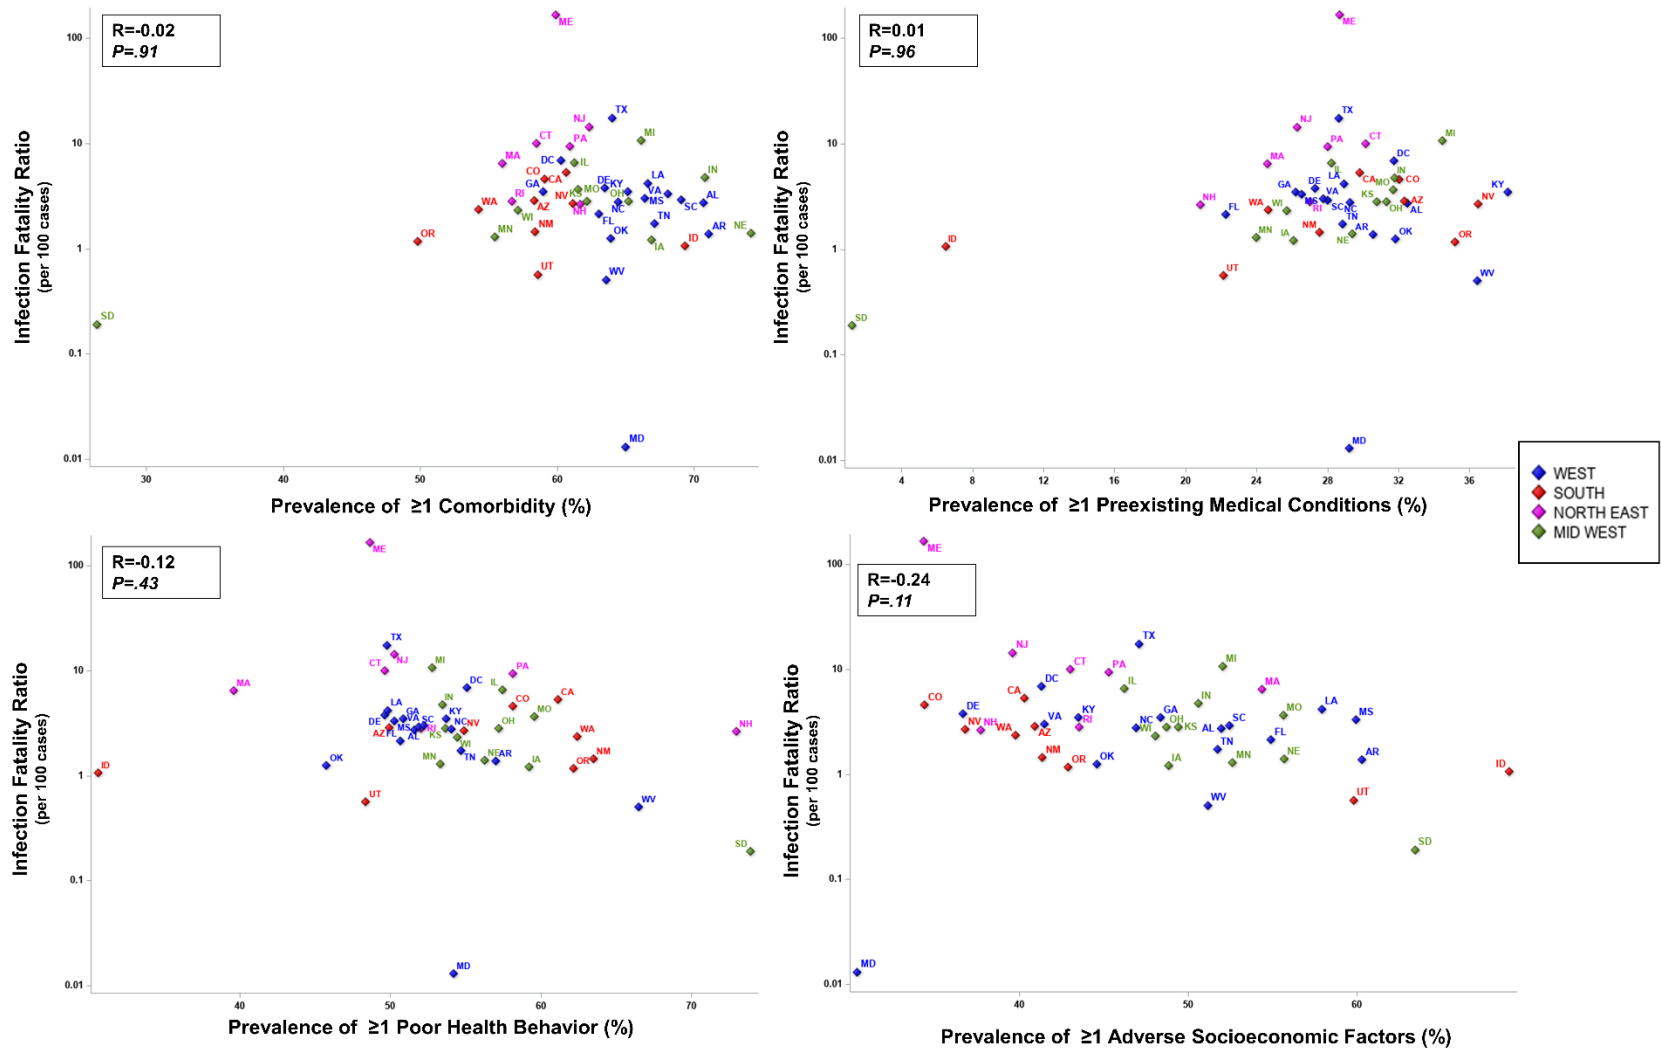

**Figure. Relationship of Geographic Distribution of COVID-19 IFR and Prevalence of Health Determinants in Black Individuals**

**eFigure 2. Relationship of Geographic Distribution of COVID-19 Infection-Fatality Ratio and Prevalence of Health Determinants in Black Individuals**

## References

1. Pilkerton CS, Singh SS, Bias TK, Frisbee SJ. Changes in Cardiovascular Health in the United States, 2003-2011. *J Am Heart Assoc.* 2015;4(9):e001650.
2. Fang J, Yang Q, Hong Y, Loustalot F. Status of cardiovascular health among adult Americans in the 50 States and the District of Columbia, 2009. *J Am Heart Assoc.* 2012;1(6):e005371.
3. Ward ZJ, Bleich SN, Cradock AL, et al. Projected U.S. State-Level Prevalence of Adult Obesity and Severe Obesity. *N Engl J Med.* 2019;381(25):2440-2450.
